# Supplementary material for: The effect of metal ions on photocatalytic performance based on an isostructural framework
Source: Royal Society of Chemistry journal article supplement (doi:10.1039/c5dt01457c), 2015-01-01
Supplement: c5dt01457c1.pdf [file c5dt01457c1.pdf]

## **The Effect of Metal Ions on Photocatalytic Performance Based on Isostructural Framework**

**Zhichao Shao, Chao Huang, Xiao Han, Huarui Wang, Angran Li, Yanbing Han, Kai Li\*, Hongwei Hou\* and Yaoting Fan**

*The College of Chemistry and Molecular Engineering, Zhengzhou University, Zhengzhou Henan  
450001, P. R. China*

Author for correspondence:

Prof. Hongwei Hou, E-mail: [houhongw@zzu.edu.cn](mailto:houhongw@zzu.edu.cn).

## Supporting Information

**Fig. S1** Supporting structure figures.

**Fig. S2** PXRD data of **1** and **5**.

**Fig. S3** Thermogravimetric curve of **1** and **5**.

**Fig. S4** PXRD data of **1-5** after refluxing in water system.

**Fig. S5** Photocatalytic results of four kinds of dyes.

**Fig. S6** Absorption spectra of six kinds of dyes during the decomposition reaction in the presence of **5**.

**Fig. S7** The MS spectrum of photocatalytic decomposition of MB solution.

**Fig. S8** Photocatalytic reaction rate with complex **5**.

**Fig. S9** The PXRD patterns of **1** and **5** after bleaching experiment.

**Fig. S10** UV/Vis spectra of **1** and **5**.

**Fig. S11** Kubelka-Munk-transformed diffuse reflectance of complexes **1** and **5**.

**Table S1** Selected bond lengths (Å) and bond angles (deg) for **1** and **5**.

**Table S2** Crystallographic parameters of **2-4**.

**Table S3.** Hydrogen Bonds of complexes **5**.

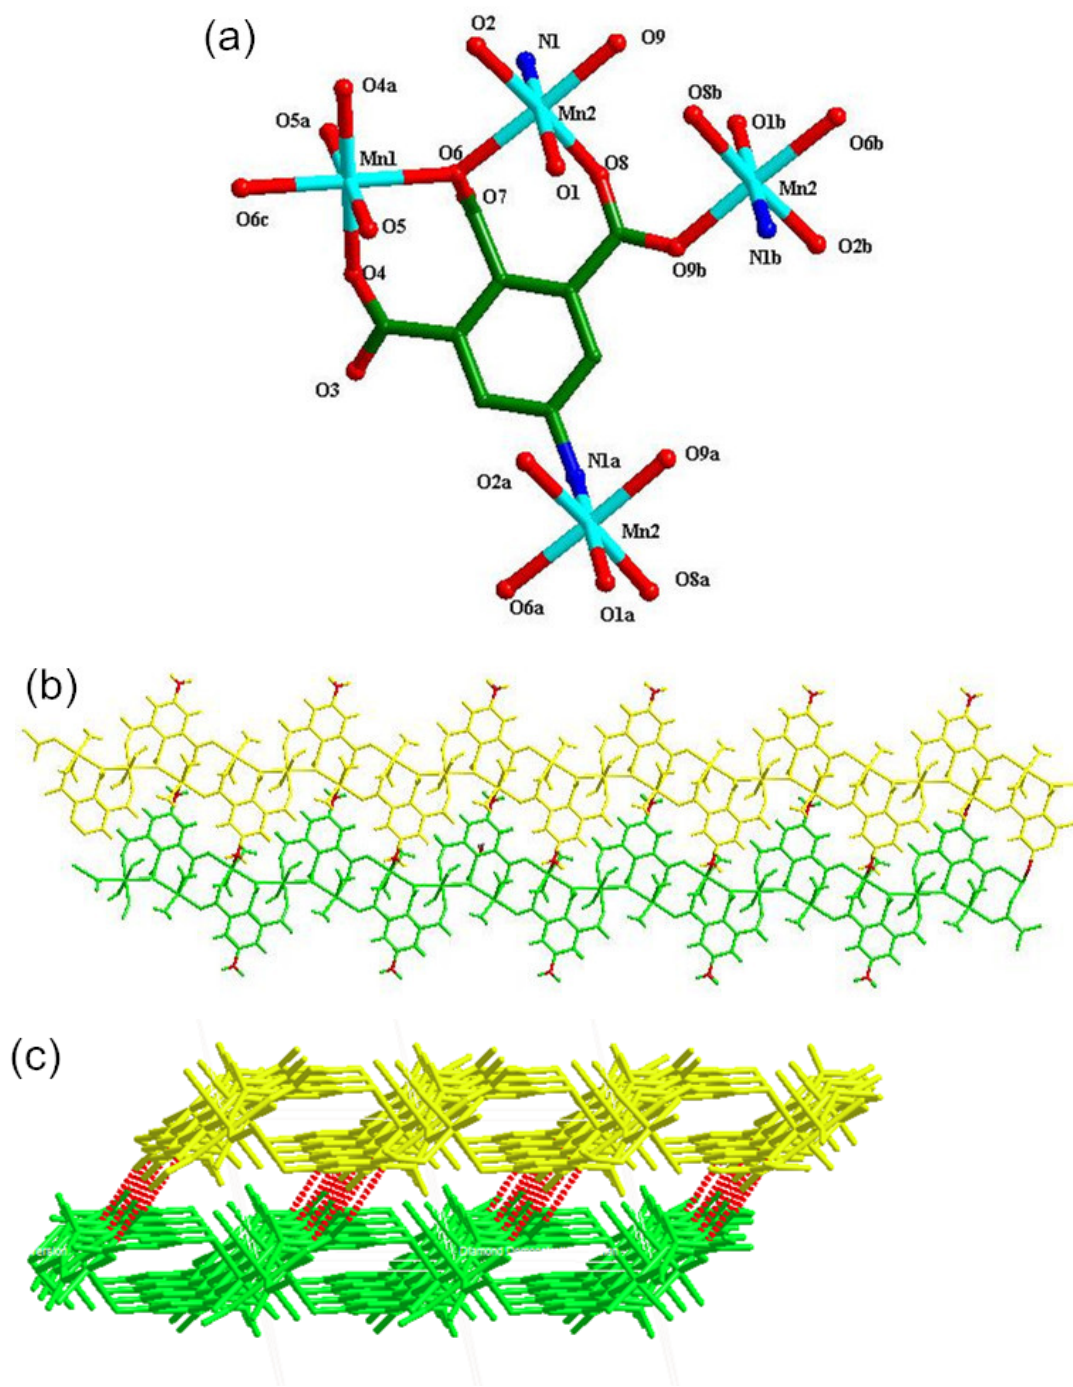

**Fig. S1** (a) Coordination environment around  $\text{Mn}^{\text{II}}$  in **1**. (b) View of connection between 1D chains. (c) View of hydrogen bond in **5**.

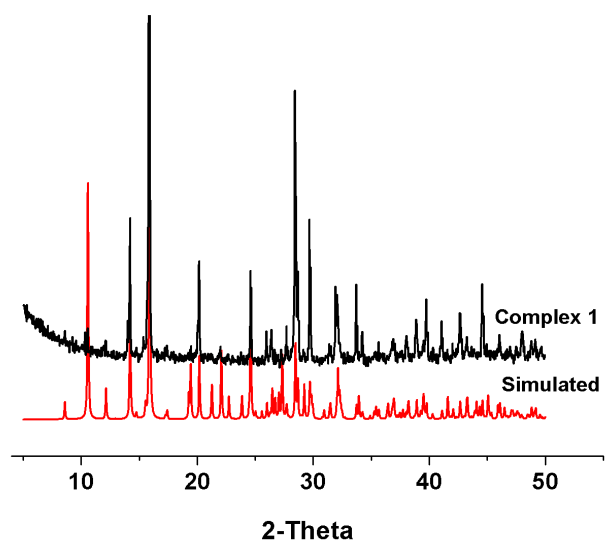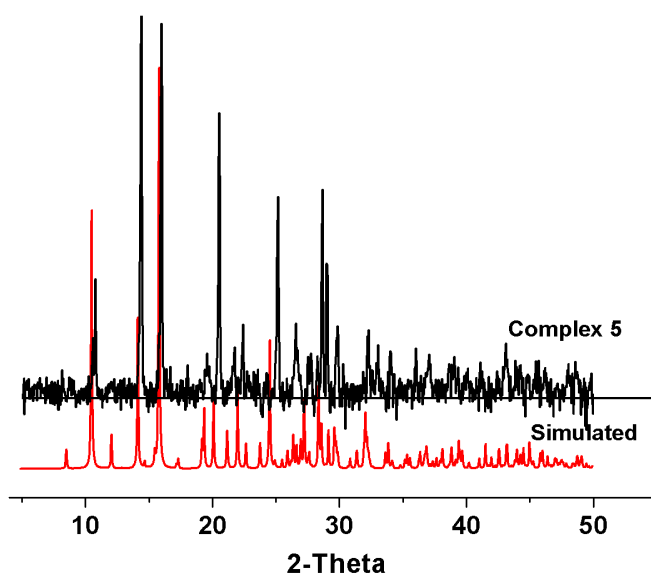

**Fig. S2** Simulated and experimental PXRD data for **1** (up) and **5** (down).

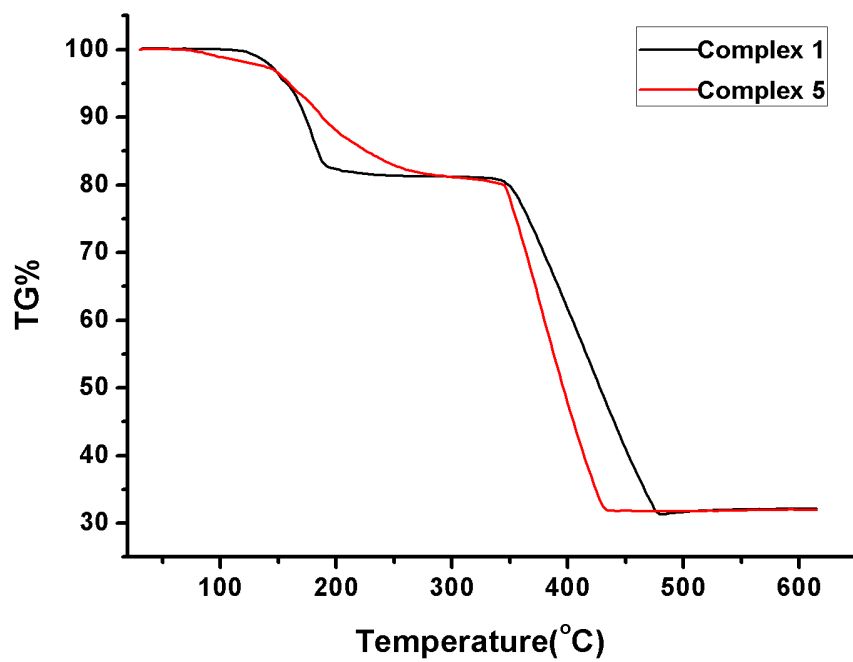

**Fig. S3** Thermogravimetric analyses of **1** and **5**.

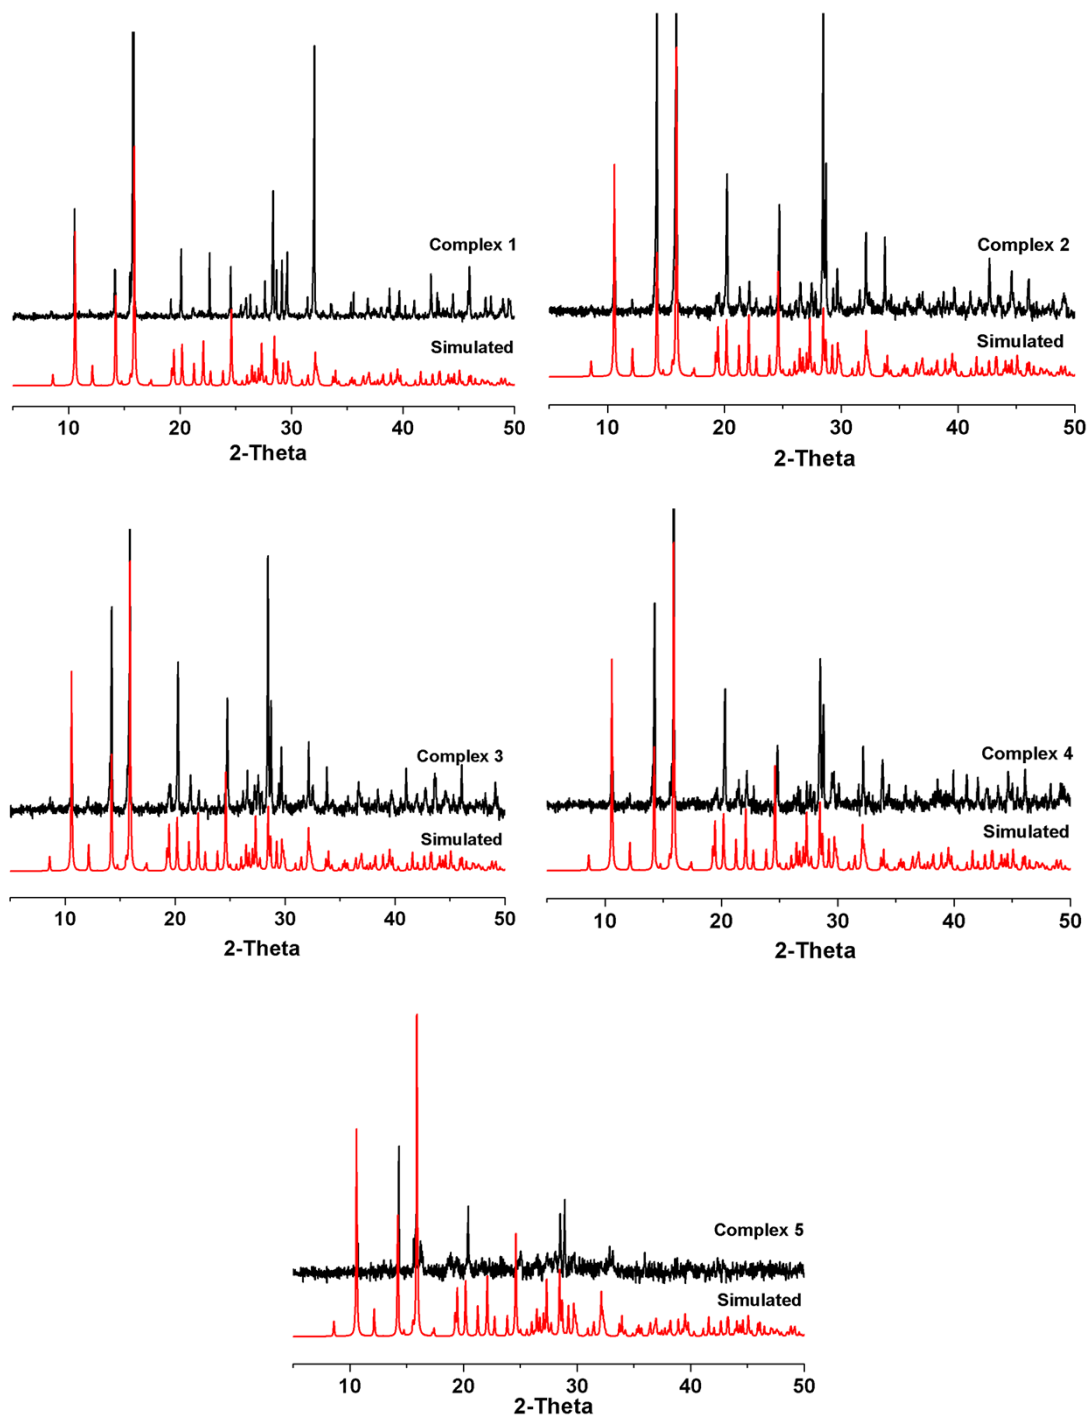

Fig. S4 Simulated and experimental PXRD data of 1-5 after refluxing in water system.

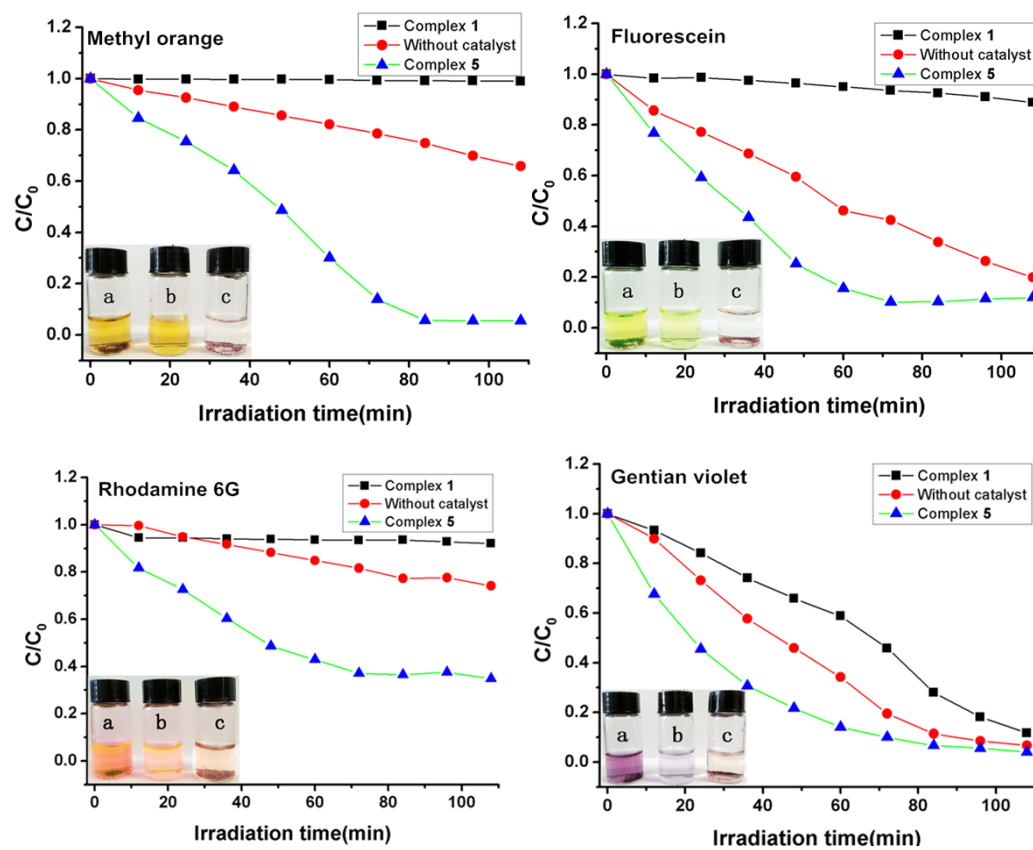

**Fig.S5** Photocatalytic decomposition of four kinds of dyes in the presence of complexes **1**, **5** and the control experiment without any catalyst under the same conditions (a: **1**, b: without catalyst, c: **5**).

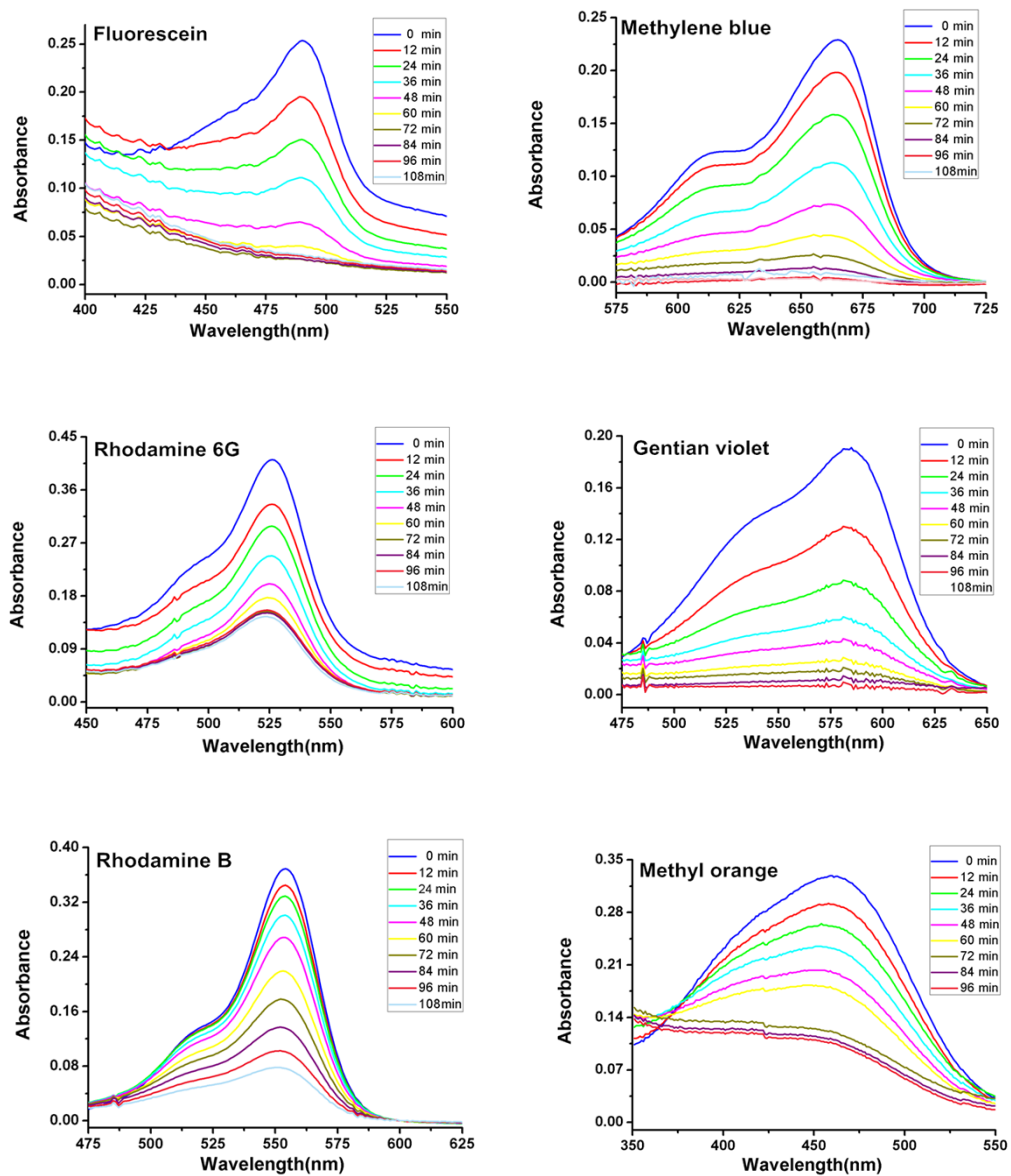

**Fig.S6** Absorption spectra of six kinds of dyes during the decomposition reaction under visible light irradiation in the presence of complex **5**.



|               |               |             |         |                 |            |                        |                       |
|---------------|---------------|-------------|---------|-----------------|------------|------------------------|-----------------------|
| Sample Name   | yajiajilan    | Position    | Vial 61 | Instrument Name | SG14237006 | User Name              | 6420-HP\admin         |
| Inj Vol       | 2             | InjPosition |         | SampleType      | Sample     | IRM Calibration Status | Not Applicable        |
| Data Filename | yajiajilan6.d | ACQ Method  |         | Comment         |            | Acquired Time          | 12/19/2014 3:34:27 PM |

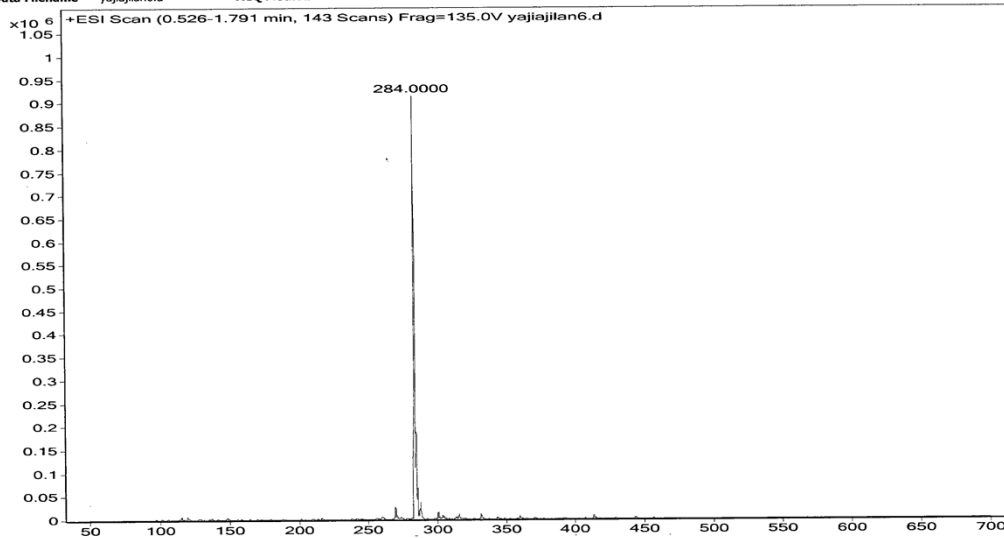

|               |               |             |         |                 |            |                        |                       |
|---------------|---------------|-------------|---------|-----------------|------------|------------------------|-----------------------|
| Sample Name   | yajiajilan-2  | Position    | Vial 71 | Instrument Name | SG14237006 | User Name              | 6420-HP\admin         |
| Inj Vol       | 2             | InjPosition |         | SampleType      | Sample     | IRM Calibration Status | Not Applicable        |
| Data Filename | yajiajilan5.d | ACQ Method  |         | Comment         |            | Acquired Time          | 12/19/2014 3:30:10 PM |

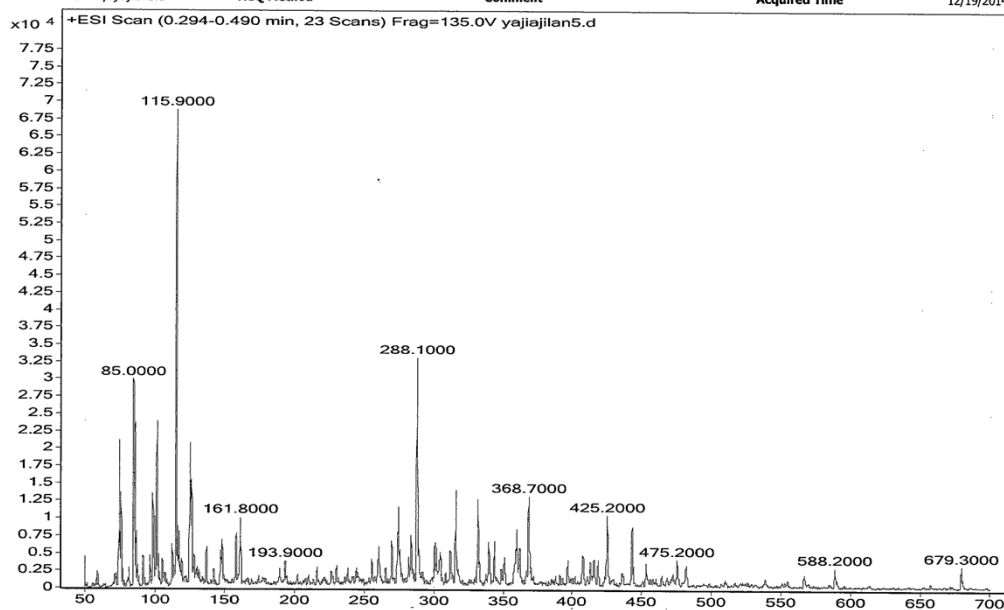

**Fig.S7** MS spectrum before (up) and after (down) the reaction of photocatalytic decomposition of MB solution.

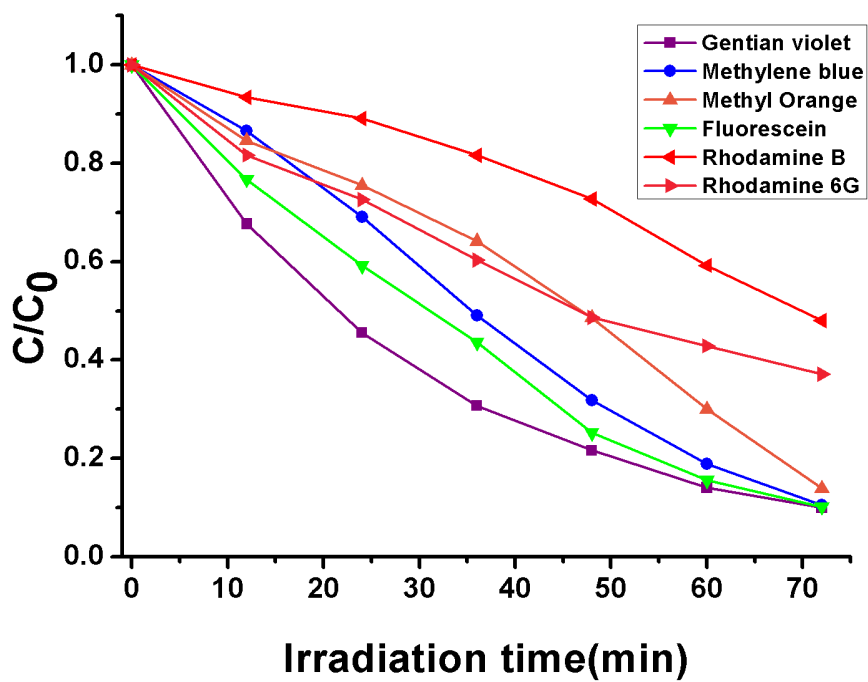

**Fig.S8** Photocatalytic decomposition of six kinds of dyes solution under visible light irradiation in the presence of complex 5.

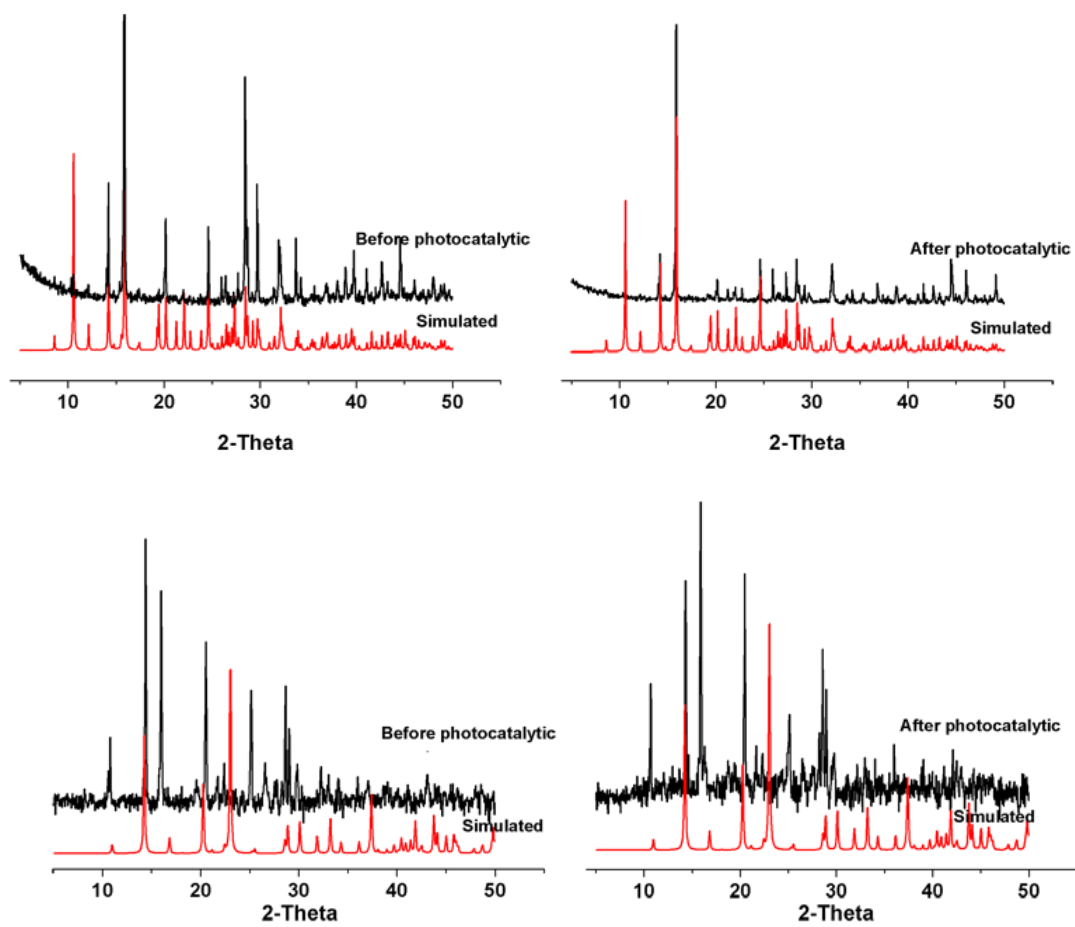

**Fig.S9** The PXRD patterns of **1** (up) and **5** (down) at the end of final repeated bleaching experiment.

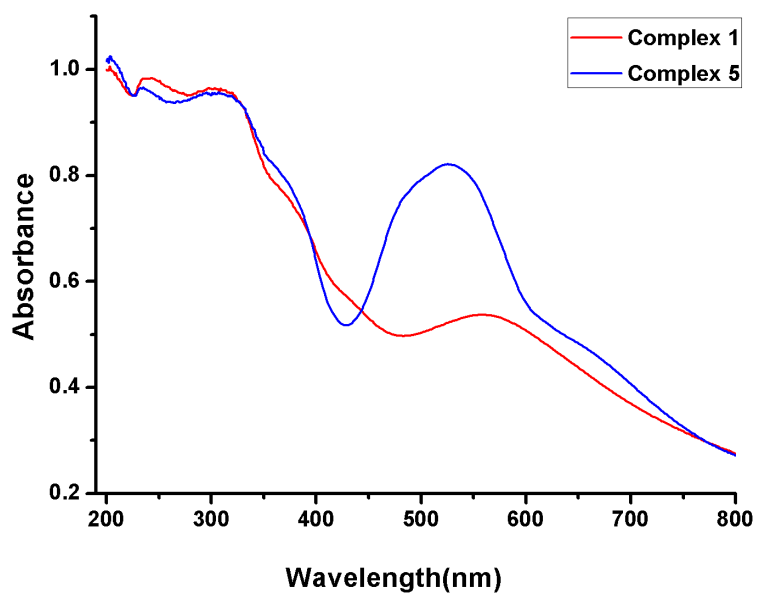

**Fig.S10** UV/Vis spectra of **1** and **5**.

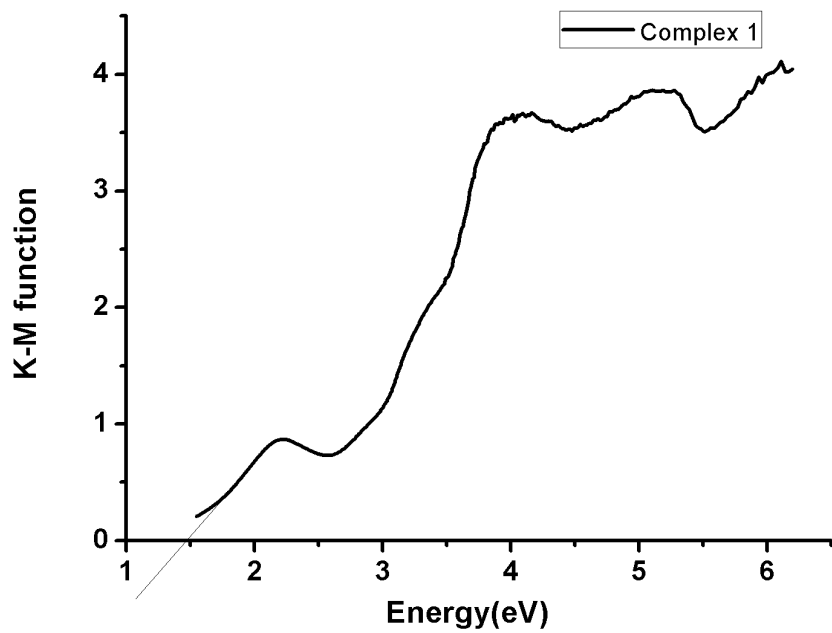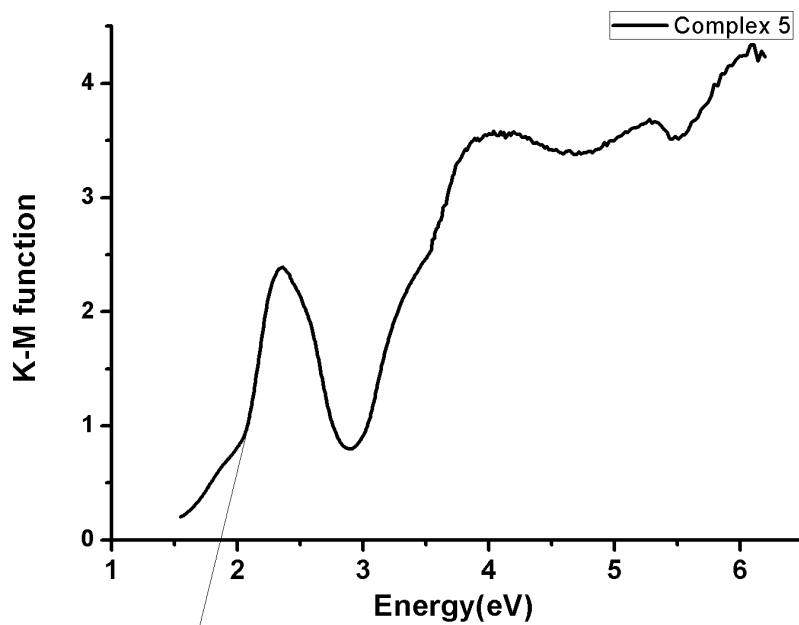

Fig.S11 Kubelka-Munk-transformed diffuse reflectance of complexes 1 and 5.

**Table S1** Selected bond lengths (Å) and bond angles (deg) for **1** and **5** crystal structure description.

| Complex 1           |                 |                     |                   |
|---------------------|-----------------|---------------------|-------------------|
| O(1)-Mn(1)          | 2.2201(19)      | Mn(1)-O(3)#2        | 2.169(2)          |
| O(1)-Mn(2)#1        | 2.255(2)        | Mn(1)-O(7)#2        | 2.173(3)          |
| O(7)-Mn(1)          | 2.173(3)        | Mn(1)-O(1)#2        | 2.2201(19)        |
| O(8)-Mn(2)          | 2.109(2)        | Mn(2)-O(6)#3        | 2.114(2)          |
| O(5)-Mn(2)#1        | 2.156(2)        | Mn(2)-O(5)#4        | 2.156(2)          |
| O(9)-Mn(2)          | 2.224(2)        | Mn(2)-O(1)#4        | 2.255(2)          |
| O(3)-Mn(1)          | 2.169(2)        | Mn(2)-N(1)          | 2.316(2)          |
| O(6)-Mn(2)#3        | 2.114(2)        | O(6)#3-Mn(2)-O(1)#4 | 174.52(7)         |
| O(3)#2-Mn(1)-O(3)   | 180.000(1)      | O(5)#4-Mn(2)-O(1)#4 | 82.36(7)          |
| O(3)#2-Mn(1)-O(7)#2 | 90.06(11)       | O(9)-Mn(2)-O(1)#4   | 86.37(8)          |
| O(3)-Mn(1)-O(7)#2   | 89.94(11)       | O(8)-Mn(2)-N(1)     | 96.86(11)         |
| O(3)#2-Mn(1)-O(7)   | 89.94(11)       | O(6)#3-Mn(2)-N(1)   | 91.40(9)          |
| O(3)-Mn(1)-O(7)     | 90.06(11)       | O(5)#4-Mn(2)-N(1)   | 81.60(8)          |
| O(7)#2-Mn(1)-O(7)   | 180.0           | O(9)-Mn(2)-N(1)     | 168.20(8)         |
| O(3)#2-Mn(1)-O(1)#2 | 83.98(7)        | O(1)#4-Mn(2)-N(1)   | 84.47(8)          |
| Symmetry codes:     | #1 x,y-1,z      | #2 -x,-y,-z+2       | #3 -x+1,-y+1,-z+1 |
|                     |                 | #4 x,y+1,z          |                   |
| Complex 5           |                 |                     |                   |
| Co(1)-O(5)          | 2.069(3)        | Co(2)-O(2)          | 2.020(3)          |
| Co(1)-O(5)#1        | 2.069(3)        | Co(2)-O(9)#2        | 2.054(2)          |
| Co(1)-O(4)#1        | 2.115(2)        | Co(2)-O(8)#3        | 2.107(2)          |
| Co(1)-O(4)          | 2.115(2)        | Co(2)-O(1)          | 2.134(3)          |
| Co(1)-O(6)#1        | 2.162(2)        | Co(2)-O(6)#3        | 2.168(2)          |
| Co(1)-O(6)          | 2.162(2)        | Co(2)-N(1)          | 2.176(3)          |
| O(5)-Co(1)-O(5)#1   | 180.0           | O(2)-Co(2)-O(9)#2   | 88.21(11)         |
| O(5)-Co(1)-O(4)#1   | 90.37(11)       | O(2)-Co(2)-O(8)#3   | 175.30(10)        |
| O(5)#1-Co(1)-O(4)#1 | 89.63(11)       | O(9)#2-Co(2)-O(8)#3 | 96.07(9)          |
| O(5)-Co(1)-O(4)     | 89.63(11)       | O(2)-Co(2)-O(1)     | 91.64(12)         |
| O(5)#1-Co(1)-O(4)   | 90.37(11)       | O(9)#2-Co(2)-O(1)   | 92.39(10)         |
| O(4)#1-Co(1)-O(4)   | 180.00(12)      | O(8)#3-Co(2)-O(1)   | 90.12(10)         |
| O(5)-Co(1)-O(6)#1   | 88.45(10)       | O(2)-Co(2)-O(6)#3   | 89.99(10)         |
| O(5)#1-Co(1)-O(6)#1 | 91.55(10)       | O(9)#2-Co(2)-O(6)#3 | 178.06(8)         |
| O(4)#1-Co(1)-O(6)#1 | 86.53(9)        | O(8)#3-Co(2)-O(6)#3 | 85.70(8)          |
| O(4)-Co(1)-O(6)#1   | 93.47(9)        | O(1)-Co(2)-O(6)#3   | 88.39(10)         |
| O(5)-Co(1)-O(6)     | 91.55(10)       | O(2)-Co(2)-N(1)     | 95.40(12)         |
| O(5)#1-Co(1)-O(6)   | 88.45(10)       | O(9)#2-Co(2)-N(1)   | 91.89(10)         |
| O(4)#1-Co(1)-O(6)   | 93.47(9)        | O(8)#3-Co(2)-N(1)   | 82.56(9)          |
| O(4)-Co(1)-O(6)     | 86.53(9)        | O(1)-Co(2)-N(1)     | 171.87(10)        |
| O(6)#1-Co(1)-O(6)   | 180.0           | O(6)#3-Co(2)-N(1)   | 87.54(9)          |
| Symmetry codes:     | #1 -x+2,-y+2,-z | #2 -x+1,-y+1,-z+1   | #3 x,y-1,z        |
|                     |                 | #4 x,y+1,z          |                   |

**Table S3.** Hydrogen Bonds of complexes **5**.

| Complex                    | D-H···A              | d(D-H) (Å) | d(H···A) (Å) | d(D···A) (Å) | <(D-H···A) (deg) |
|----------------------------|----------------------|------------|--------------|--------------|------------------|
| <b>5</b>                   | O(2)-H(2W1)...O(3)#1 | 0.852(19)  | 1.86(2)      | 2.701(4)     | 167(4)           |
| Symmetry codes: #1 x-1,y,z |                      |            |              |              |                  |

**Table S2** Crystallographic parameters of **2-4**.

| Complex          | <b>2</b>   | <b>3</b>   | <b>4</b>   |
|------------------|------------|------------|------------|
| a/Å              | 7.4267(15) | 7.4136(14) | 7.4158(11) |
| b/Å              | 8.5085(17) | 8.5154(11) | 8.4779(12) |
| c/Å              | 10.381(2)  | 10.279(3)  | 10.165(9)  |
| a/u              | 82.69(4)   | 82.64(2)   | 82.67(4)   |
| b/u              | 83.44(6)   | 83.45(9)   | 83.36(8)   |
| c/u              | 79.82(8)   | 79.72(3)   | 79.89(6)   |
| V/Å <sup>3</sup> | 632.7(2)   | 629.2(4)   | 625.6(7)   |
